# Supplementary material for: RNA Interference of Chitin Synthase 2 Gene in Liriomyza trifolii through Immersion in Double-Stranded RNA
Source: Insects. 2022 Sep 13;13(9):832. doi: 10.3390/insects13090832 (PMC9504599; doi:10.3390/insects13090832)
Supplement: Supplementary file 1 [file insects-13-00832-s001.zip › Figure S1.pdf]

1 ATGGCTGGCTTAAACATCGGCCCTAGTTCACCTGGAGCGGTGAGAGCGATGACAAATTTATCAGACGACGAG  
2 MA G L K H R P L V P F G A S D N L S D E  
3 ATGCTCCATTAAACAGCAATTTATAGCGGAAGTCACAGCAATATGAGAAACAAAGCTGGGATGTTT  
4 S A P L T Q D I Y S G S O R T Y A E T K G W D V F  
5 CGAGATCCACCGGTTAAATAGAACTGGTTCGACTGCCAATCAAAATGTTTAGAATAACAGTGAATTTACTC  
6 R D P P V K I E T G S T A N Q K C L E I T V K L C  
7 AAAGTATTGTCATATATTTACCAATCATCGTATGCTAGTGGTGCAGTGTAGCTAAAGGCTGTGACTCTT  
8 K V F A V L F G A V V K G L W F  
9 ATGCTTCAACAACCTAGTAAGGATAAGAAATAGAATTTGTAATAAAGATTGGGACGTGATAAAGATTGTT  
10 M T S Q L R K D K K I E E F C N K D L G R D K R E V  
11 GTCACCTTGGCAGAAAGACGATTTGCCTGGATTTGGGCTTACTAATAGCCTATGCGGTGCGGGAATCGGT  
12 V T L P E E E R T A W W G L L T A Y A V P E I G  
13 TCATTAACTGTTACGCTGCTATTTGTTCTTCAAAACATTCAAAGTGGCCAGCAACACCACATTTCTTTTGG  
14 S L I R S A R I C F F K T F K V P T T P H F F V  
15 GCATTATGGAGACCATGACACACTGGGCACAGCCTGCTTGTGTTTGTGTACTACCAATGTTGGATGCCAT  
16 A F F M E T T S T T G T A T L V F V L P N V D A T  
17 CAAGGAGCTATGTTGACCACTGTGTATGCCCTACACTGGTATGTTTGGTCTGATGGCAGCAGCATCAAAAGAA  
18 Q G A M L T T N C V C L I P G M F G L M A R T T K E  
19 GGCAACGTCGACTCAAAGCAATGTAGACTTGGCTGCTGGCGGCTCAGGTACGGGCTCATCATATGGCGG  
20 G K R A V K A I D L A A V A A O V T G L L W P  
21 GTGTTAGAGACCGCTTGGTGTGGGTATACAGTACCTGTGTAATGATATCTGTGGTGGGAGAT  
22 V L E N R F E M W N I P V C V N I S C G W E N  
23 TAGTAGCTCCACAGGCTCCCTTGTCTATCATACGTAACAATGGGACGATCAAGGAGGAACGAAGTACACAGT  
24 Y V A P O A P E A I I R T M G R I K E E L K Y T R  
25 TATTTCACTCATATTTTCATTTCCGTTTGGAAATATTCGCTGTTTCTCTCTCTCTTTGATCATGTGGATA  
26 F S H I F F W F F F S C L E F  
27 CAAAATGAAGACTCAGCAATGTATTTGTTGGCAAGTGATGCTTTTGGTCCACACAAATCATTTGGTGAA  
28 Q N E E V S N V F V L A S D A F G P H K I I V D E  
29 TTGGACCTATAGCGGTTTCATTACGACACTGTGGAGGCGCTAATATAGACAGCATAGAAATGATGCCAAC  
30 I A P L T G S L P D D T V A A N F D S I E D A M  
31 AACACATGATTTCGACCTACTACTCTTACAATTTTCGGAGCTTATATTTGTTATATCTTTGGAAATTCGCC  
32 N N M I V H V L L L L O I E G A Y I C Y I F G K F A  
33 TGCAAAATTTCTATACAGGCTTCAGTTATGCTTTTCTGTGAGCTAACAGTGCCTGTTTGTGTATCACTACTC  
34 C K I L Q G F S Y A F P V C L V S L L  
35 ATAGCTGCTTGTGATAGCAATGATGATCCCTTTCTTCATGATATCTTCTGATATGATGCTTCA  
36 I A C G R I D D P C E F F H E S L P D Y M F E T  
37 AGTCCACCAATTTCCGTTTAAATGAATTTGTCCACCAACCAATGGCTTGGCGTGGATTCTTTGGTATTTGAT  
38 S P P N F R F N E F V T N Q M A W I L W L L S  
39 CAAACGTGATTGTTGATATTTGGACCGCAATGTGAAGATTGGCTGCCATGAGAAATATTTGTAA  
40 C T W I S L H M E P K C E R L A T E K V E K  
41 CCGATGATGACTCACTGTTAATGATCAATCTTTGGCCATGAATAGAAGAGAGATGATCAAGCGGATGTAA  
42 P M Y D S L L I D O S L A M N R R R D D Q A D V K  
43 ACTGAGGATTGTTAGAATTTGAAAGAAAGAGGACAGCAATCTATGAACCATATCTGTACACACTGAGGT  
44 T E D L E Y Y T E F V H T E C  
45 TCCTTTTACCAGTAAATCGAATTAATCTCCTCAGTACATACCTCGTATATATGCTGTGTACCATTTGG  
46 S H L P S K S N I K S S D H I T R I Y A C A T M W  
47 CATGAACCTAAGGATGAATGATGGAGTTCTGAAGAGTTATGAGAATGGATGAGGATCAATGTGAACAGCT  
48 F E T K D E M E F F L K S I M R V D E D Q A R R  
49 GTGGCAGAAATATTTACGATATGATGCTGATGATGATGATGATGATGATGATGATGATGATGATGATGAT  
50 V A O K Y L R I V D P D Y Y E F E E T H I F F D D C  
51 TTCGAAATTTCCGATCAGCTGATGATGATGATGATGATGATGATGATGATGATGATGATGATGATGATGAT  
52 F E I S D H S D D D V Q V N R F V K L L M N T M D  
53 ATAGCTGATCAGAAATACATCAGCTACTATAGCTTATGGCCACCAAAATATTTATCCCTTATGGTGGT  
54 A S E H S Q T E N V A L P K P E T  
55 CGTTTATGTTGATTTACCAGGAAACAAAGTTTATTACTACATGAAGACAAAGATCGCATACGATCTCT  
56 R L V W I L P G K T K F I T H M K D K D R I R T R  
57 AAACGTTGGCTCAAGTTATGATGATGATGATGATGATGATGATGATGATGATGATGATGATGATGATGAT  
58 E R W S Q W M Y Q M H R L M E L  
59 CGCAAGGAAGTTATAGCAAAATACTTATCTCTGACACTCGATGGAGACATGATTTTCAACCAAGTCTGTC  
60 R K E V I A E N T Y L L L T L D G D I D F O P S A V  
61 ACCCTACTGGTCGATTTAATGAAGAAAGATAAAATCTGGGAGCTGCTTGGTGGTATACATCCCGTGGGCTC  
62 E S L L V L L M M K A C G N R A K  
63 GGTCTTGGTATGGTATCAGTTATTCGAATATGCTATTTGTCATTTGGCTGCAAAAGCCACTGACGATGATA  
64 G P M V W Y Q L F E Y A I G H W L Q K A T E H M I  
65 GTTTGGTGGTGGTGGTGGTGGTGGTGGTGGTGGTGGTGGTGGTGGTGGTGGTGGTGGTGGTGGTGGTGGT  
66 A G T A T A C T A C A A G C A G C A G C A G C A T A T G T G C A A T A T G A A G A A T G A T G A A  
67 K Y T T K S A E A R H Y V O Y D O G E D R W L C T  
68 CTATTGTGCAAGAGGCTATCGTGTAGAATATTCAGCTGCCTCGGATGCTACACACATTTGCCAAGGTTTC  
69 L L L L O R G Y R V E S A A S D A Y T H C P E G F  
70 AATGAGTCTCAATCAATCAATCAATCAATCAATCAATCAATCAATCAATCAATCAATCAATCAATCAATCA  
71 N E E F N R A W M R A E S D N  
72 AAACGTACAATCAAGATCAATCAATCAATCAATCAATCAATCAATCAATCAATCAATCAATCAATCAATCA  
73 K R T I K I N D N I S L L Y I F Y Q M M L M G G T  
74 ATACTTGGTCTGGTACTATTTCTTATGTTGGTGGAGCTTTTGGTGGTGGTGGTGGTGGTGGTGGTGGTGG  
75 L S F P L M L E F V A L R W A T  
76 TCTTTCCATTACAACATTTGCCCCATATTGCTATTCACTGTTGGTCTGTTTACATGTAATCAATCAATCA  
77 S F H Y N I C P I L L L F M L V C F T C K S N I Q L  
78 TTTTGGCAGAGTGCCTTCCACAAATATAGCACTTGTATGATGGCAGTATTTGTCGGTACGCTTTACAATTG  
79 V W F A C L V A T V A I V G G L F R C  
80 GGAGAGGATGAATCGTTACCTTCAGCTATGTTCTGATGCGCATGACATCTGCTGTTGTGATGATGATGAT  
81 G E D G I G S P S A I F L M A M T S S F V I A I A  
82 CTGCATCCGAGGAATTCGTTGCATATCGGCAGTGTCTATTATCTACTTTCTATACCGTCTATGATCTGTA  
83 L H P Q E S I S A G V I Y L S I S E M Y L L  
84 TTGATCTGTTACTCATTAATCTGAATGTTGTGCTGGGAAACAGAGAAGTATTGCCACGAAACAG  
85 I L I P Y T I N S A N V Y A K K T K  
86 AAAGAGTTGGAAGCAGAGAAAAGGACGCTGAAGAGGCTGTAAGGCAATTAACAAAAGAGTTTGTGAGTTTC  
87 K E L E A E K K A A E E A A K A I K Q K S L L S F  
88 TTGCAAGGAGGAGCTGATGATGATGATGATGATGATGATGATGATGATGATGATGATGATGATGATGATG  
89 L Q G G F A Q G S T N G A G S L A G L F R C  
90 ATGTTTGCACACCGGAACCAAGAAGAAAAGTGAACACTGACAGCTATGCTGAATCTTTGAGAGCAATT  
91 M F C T H T G K T T E E K V O L T A I A E S L E T I  
92 AACAGTCGATGATGATGATGATGATGATGATGATGATGATGATGATGATGATGATGATGATGATGATG  
93 N S R M D S I E H A L D P H G Q H S R H G R R R T  
94 ACTTCTAGTGGTTCCAGGAGCCACCATTTATATCATCAGTAGCTGAAGATCCGACACGAATCAGAGGAACT  
95 T S S G R D H R A E S D N  
96 GAACAGATACATCAGCTGAACCTAAACGAGACGATGATCATTTAATTAATCCTTATTTGGTGAAGATCCAG  
97 E T D T S A E P K P E R D H L I N P Y W V E D P E  
98 CTACGTAAGGTGAAGTGGCTTACTTGGCAATGAGAAATTCAGTTTGGAAAGACTTAATGACAAATGATCTC  
99 L R K G E V A Y L D N A E I Q F W K D L I D K Y L  
100 TTCCCAATTTGATATGATCTGTTGGAGACGGCCGATTTGCAAGTATGATGATGATGATGATGATGATGATG  
101 F P I D N D P A S V R N K S  
102 TTGCTTTCTTTTGGCCACGCTTGTTCGATTGATTGTTCTTCTGCTGCAACTGAACAAAGACAGTTCGAT  
103 F A F F M A N A L F V L I V F L L Q L N K D K L H  
104 ATAGTTTGGCCATTGGTGTCAAAACGAATATTACATACATACGAGACATCTGAGGTACATATCAAAAGAG  
105 I V W P L G V K T N T Y I P E T S E V H I S K E  
106 TATCTCAATTTGAGGCCATCGGTTAGTATTGTTGTTCTTCTGCTGTTGATTTAATCATACAAATCACTGCT  
107 Y L Q L E P I G L V F V F F A L I L I Q P T A  
108 ATGTTGTTCCATCGTTTGGTACTTGGACATATACCTGGCTCCACTGAATGAACCTCTGCAAAAGAAATCA  
109 M L F H R F G T L A H I L A S T E L N F C K K K S  
110 GAAGATCTTTCTCAGGATGCTTTAATCGATAAGCATGCGGTTGAGATAGTGAAGATCTTCAACGACTGCAAGT  
111 E D L S Q D A L I D K H A V E I V K N L Q R L Q G  
112 ATTGATGAGACTATGACATGATCTGTTAGTGGTCCGATGCAATAGCCAGAGACGTACATACAAATATA  
113 I D G D Y D N D S G S F D R I A R R R T  
114 GAAAAGCTAGTAACCGCGCTGACAAATTTGATACATTTGATGTTGCTTTCAAGAAACGTTTCTCAATTA  
115 E K A S K P R R O I G T L D V A P K K R F L K L K  
116 GCAGATGAAAATATCTGCCACTGCCATCTTGCAGAGCTTGAACATGCGTGGTGAACACTATACGCTGCTT  
117 A D E N N P A T P I L A R R L T M R A E T I R A L  
118 GAAGTAGAAAAATCTTTGCTGGCAGAGAACGAGTCACAAATGCAACTTTGGGTACAAACCTGAATAT  
119 E V R K N S L L A E K R K S Q M T L T K P E Y  
120 GGCACTCTCCAGCAATAGTATAATATATGATGTTTACCGAATGGAGCAATGGTGCACCTTCCACTGCT  
121 G I T P A N K Y N N Y D G L P N G R N G R T S T A  
122 GGCACTGAGTCAAGGATGTTTTAACTACCCCAATCGAGAGCAAAATTTATGGCTCCAATGGAGGTGGCACTG  
123 G M S K D V F N L P N A E Q I G S N G G G T V  
124 AACCTTGGTACAGTGTATTGGATGACCGATGCTTAATCTTACATCTTGAACCTCGAAGCCACAGGTTG  
125 N L G V E H V L D D D R N S L L L T I R S P Q V  
126 TCTTGGGTCAACATAGTAATGGACCTGCAATCTGACAGGCGTTTGTAG  
127 S W V N N S N G P A N L T G R L \*

**Figure S1** Nucleotide sequences for *L. trifolii* CHS2 cDNA and its predicted amino acid sequence. Nucleotide numbering starts with the adenine in the first methionine codon of the putative open reading frame. The highly conserved region, chitin\_synth\_2 domain, is highlighted. The asterisk indicates the translational termination codon. The EDR and QRRRW motifs are boxed.
